# Supplementary material
Source: Research Square preprint supplement (doi:10.21203/rs.3.rs-9436198/v1)
Supplement: Supplementary file 1 [file 82819b4a62609301b5ed6e7c.docx]

|  |
| --- |
| **Figure S1.** Distribution of intraindividual changes in hair cortisol concentrations between T1 and T2 (Δ cortisol = T2 - T1). Positive values indicate increases in cortisol levels over time. The distribution is centered around zero, with the majority of participants showing small to moderate changes and few extreme values. |
